# Supplementary material for: Genetic evidence elucidates the effect of gut microbiota on diverticular disease: A bidirectional Mendelian randomization study
Source: Preprints.org preprint supplement (doi:10.20944/preprints202410.1462.v1), 2024-10-18
Supplement: Supplementary file 1 [file supplementary]

## Sheet: Table S1
Table S1. The instrumental variables of microbiota
Microbiota	SNP	other_allele	effect_allele	beta	se	pval	chr	bp	N	EAF	R2	F-statistics
genus.Allisonella	rs602075	G	A	0.168974	0.0296976	3.57e-08	9	79110160	3212	0.2306	0.0101317	32.8557
genus.Bifidobacterium	rs182549	T	C	0.119703	0.0127294	1.28e-20	2	136616754	14778	0.4911	0.00716219	213.17
genus.Bifidobacterium	rs7322849	C	T	0.112428	0.0201813	1.08e-08	13	112859829	14778	0.9036	0.00220209	65.2155
genus.Candidatus Soleaferrea	rs830151	A	G	0.194561	0.0347932	4.26e-08	19	47985753	5787	0.0666	0.00470633	27.3549
genus.Enterorhabdus	rs11098863	A	T	-0.0966008	0.0162677	3.06e-09	4	127336602	7524	0.5179	0.00465988	35.2157
genus.Erysipelatoclostridium	rs7221249	G	A	0.0839861	0.0142741	4.31e-09	17	10177708	9781	0.5467	0.00349606	34.3079
genus..Eubacterium coprostanoligenes group	rs17159861	T	C	0.0962228	0.0168388	1.04e-08	7	31085162	17380	0.1332	0.00213801	37.2339
genus.Faecalibacterium	rs12320842	G	C	0.094833	0.0163962	7.57e-09	12	83502773	17638	0.1322	0.00206348	36.4667
genus.Intestinibacter	rs10805326	A	G	0.0775151	0.0139665	3.55e-08	4	14324623	12303	0.7217	0.00241364	29.762
genus.Oxalobacter	rs736744	T	C	0.117882	0.0211262	2.57e-08	9	87514407	4655	0.5845	0.00674965	31.6195
genus.Peptococcus	rs75754569	G	C	0.181434	0.0319429	1.1e-08	3	17793504	5481	0.1103	0.00646081	35.629
genus.Romboutsia	rs61841503	A	G	0.092888	0.0171454	4e-08	10	17019559	13568	0.8628	0.00204274	27.7685
genus.RuminococcaceaeUCG009	rs8009993	C	G	-0.135936	0.0244857	4.42e-08	14	39306809	7389	0.8708	0.00415797	30.8431
genus.RuminococcaceaeUCG013	rs12781711	T	C	-0.0656129	0.0117477	2.55e-08	10	2219930	16772	0.3131	0.00185176	31.1117
genus..Ruminococcus torques group	rs35866622	C	T	-0.0612024	0.0109421	2.21e-08	19	49218060	17240	0.5596	0.00184625	31.8846
genus.Ruminococcus1	rs10769159	C	G	-0.0640277	0.0110059	5.29e-09	11	45688595	16603	0.4662	0.0020404	33.942
genus.Streptococcus	rs11110281	C	T	-0.137519	0.0227398	2.58e-09	12	100584014	15120	0.9324	0.00238399	36.1272
genus.Tyzzerella3	rs67476743	G	T	0.132164	0.022208	3.74e-09	19	1030320	4948	0.7147	0.00712327	35.4845

## Sheet: Table S2
Table S2. The instrumental variables of blood microbiota-associated metabolites
Metabolites	SNP	Chr	Position	EA	OA	MAF	Beta	SE	P	N	R2	F-statistics
Betaine	rs10178297	2	105000000	T	C	0.16	0.207	0.046	6.74e-06	2076	0.0115178	24.143
Betaine	rs1868264	2	239000000	A	G	0.195	0.192	0.042	4.92e-06	2076	0.0115735	24.261
Betaine	rs11742447	5	118000000	C	T	0.345	0.246	0.051	1.16e-06	2076	0.0273502	58.2631
Betaine	rs6862283	5	78319638	C	T	0.306	0.193	0.036	9.57e-08	2076	0.0158207	33.3074
Betaine	rs10817686	9	118000000	T	C	0.471	0.456	0.095	1.68e-06	2076	0.103618	239.515
Betaine	rs10786317	10	83013779	G	A	0.437	0.158	0.035	4.72e-06	2076	0.0122838	25.7686
Betaine	rs10883712	10	104000000	T	G	0.404	0.159	0.035	4.02e-06	2076	0.0121745	25.5365
Betaine	rs11030909	11	29977241	A	C	0.089	0.288	0.064	7.3e-06	2076	0.01345	28.2484
Betaine	rs1321958	11	31048683	G	A	0.388	0.152	0.034	8.12e-06	2076	0.0109724	22.987
Betaine	rs2087307	12	10262275	G	T	0.259	0.172	0.039	8.63e-06	2076	0.0113555	23.7988
Betaine	rs17815398	18	49713756	A	G	0.02	0.838	0.187	7.19e-06	2076	0.027528	58.6525
Betaine	rs2879414	18	49708960	G	A	0.459	0.153	0.033	5.03e-06	2076	0.0116258	24.372
Betaine	rs358538	19	33004825	A	G	0.055	0.456	0.102	7.86e-06	2076	0.0216149	45.7756
Carnitine	rs4656852	1	160000000	C	T	0.053	0.508	0.114	8.3e-06	2076	0.025905	55.1025
Carnitine	rs7606454	2	45942363	C	T	0.139	0.235	0.053	9.62e-06	2076	0.0132185	27.7557
Carnitine	rs9879988	3	5309556	A	G	0.163	0.239	0.047	3e-07	2076	0.0155862	32.8058
Carnitine	rs11733138	4	23160661	G	A	0.346	0.225	0.05	6.1e-06	2076	0.0229113	48.5853
Carnitine	rs274554	5	132000000	T	C	0.159	0.211	0.046	4.68e-06	2076	0.0119066	24.9678
Carnitine	rs6959875	7	19822005	G	A	0.301	0.27	0.055	7.58e-07	2076	0.0306762	65.5725
Carnitine	rs10821590	10	61527027	G	A	0.071	0.598	0.112	8.99e-08	2076	0.0471744	102.585
Carnitine	rs1171610	10	61477697	C	T	0.383	0.195	0.036	6.63e-08	2076	0.0179715	37.9183
Carnitine	rs1171617	10	61467182	G	T	0.23	0.418	0.04	5.87e-26	2076	0.0618872	136.69
Carnitine	rs16913790	10	61346182	G	A	0.138	0.216	0.048	7.18e-06	2076	0.0111	23.2574
Carnitine	rs562672	11	126000000	C	T	0.366	0.234	0.052	7.39e-06	2076	0.0254116	54.0257
Carnitine	rs6108228	20	8978063	G	T	0.406	0.175	0.037	2.56e-06	2076	0.0147713	31.065
Carnosine	rs4692008	4	166000000	T	C	0.159	-0.431	0.088	1.04e-06	2076	0.0496796	108.317
Carnosine	rs17650599	5	16582360	T	C	0.047	-0.515	0.113	4.85e-06	2076	0.0237594	50.4276
Carnosine	rs248003	5	167000000	G	A	0.405	0.236	0.053	8.27e-06	2076	0.0268427	57.1522
Carnosine	rs920709	5	77167972	G	T	0.041	-0.673	0.13	2.16e-07	2076	0.0356174	76.5249
Carnosine	rs1485834	6	102000000	A	G	0.065	-0.672	0.148	5.69e-06	2076	0.05489	120.337
Carnosine	rs1859294	7	107000000	G	C	0.344	0.307	0.063	1.11e-06	2076	0.0425372	92.0528
Carnosine	rs17252982	8	107000000	G	T	0.033	-0.822	0.186	9.37e-06	2076	0.0431235	93.3787
Carnosine	rs17154771	10	14214910	G	C	0.056	-0.519	0.104	6.37e-07	2076	0.028479	60.7383
Carnosine	rs12270847	11	41360862	T	C	0.112	0.354	0.078	5.66e-06	2076	0.0249269	52.9688
Carnosine	rs9317418	13	23612546	C	T	0.276	-0.305	0.061	6.26e-07	2076	0.0371773	80.0057
Carnosine	rs9530800	13	79097727	G	A	0.032	-0.827	0.182	5.9e-06	2076	0.0423708	91.6766
Carnosine	rs10520795	15	96182230	C	T	0.025	1.014	0.226	7.44e-06	2076	0.0501246	109.339
Carnosine	rs11906336	20	31195876	C	T	0.112	0.531	0.112	2.26e-06	2076	0.0560854	123.114
Carnosine	rs1415405	20	4043501	G	A	0.021	0.81	0.166	1.08e-06	2076	0.0269775	57.4472
Choline	rs10098425	8	106000000	A	G	0.054	0.459	0.103	8.93e-06	2076	0.0215249	45.5806
Choline	rs10819950	9	98935333	A	G	0.316	0.208	0.046	6.95e-06	2076	0.0187025	39.4902
Choline	rs4008155	9	38488919	C	T	0.156	0.215	0.047	4.02e-06	2076	0.0121723	25.5319
Choline	rs10826197	10	60242641	C	A	0.487	0.151	0.034	8.15e-06	2076	0.0113928	23.8779
Choline	rs2408564	12	92022353	G	A	0.17	0.249	0.052	1.41e-06	2076	0.0174967	36.8987
Choline	rs4312185	13	76666534	A	T	0.427	0.156	0.035	7.13e-06	2076	0.0119086	24.9721
Choline	rs12444044	16	79466556	G	A	0.112	0.364	0.08	5.77e-06	2076	0.026355	56.0858
Indole 3 propionate	rs602825	1	112000000	G	C	0.217	0.2	0.045	8.34e-06	2076	0.0135929	28.5526
Indole 3 propionate	rs7601397	2	15722380	A	G	0.12	0.354	0.078	6.17e-06	2076	0.0264667	56.33
Indole 3 propionate	rs868179	2	178000000	C	T	0.088	-0.382	0.077	7.26e-07	2076	0.0234226	49.6955
Indole 3 propionate	rs10212294	3	85668496	G	T	0.149	-0.247	0.052	2.16e-06	2076	0.0154718	32.5613
Indole 3 propionate	rs1460100	5	168000000	C	T	0.171	-0.239	0.05	2.03e-06	2076	0.0161948	34.1081
Indole 3 propionate	rs12699655	7	14730795	T	G	0.451	-0.208	0.037	3.06e-08	2076	0.0214242	45.3629
Indole 3 propionate	rs964546	7	134000000	T	C	0.142	0.25	0.056	8.16e-06	2076	0.0152295	32.0435
Indole 3 propionate	rs2898455	8	17987012	C	T	0.191	0.237	0.051	3.25e-06	2076	0.0173584	36.6019
Indole 3 propionate	rs6987588	8	131000000	C	T	0.519	-0.165	0.037	8.19e-06	2076	0.0135928	28.5525
Indole 3 propionate	rs9656919	8	118000000	C	T	0.03	-0.535	0.12	8.1e-06	2076	0.0166583	35.1007
Indole 3 propionate	rs6487322	12	23173646	A	G	0.356	0.194	0.043	8.36e-06	2076	0.0172572	36.3847
Indole 3 propionate	rs2725571	15	54129428	C	T	0.451	0.167	0.037	6.68e-06	2076	0.0138106	29.0162
Indole 3 propionate	rs236164	20	5917428	C	T	0.158	-0.227	0.051	8.16e-06	2076	0.0137104	28.8029
Niacinamide	rs4800180	18	21786488	T	C	0.207	0.203	0.041	9.66e-07	2076	0.013529	28.4165
Niacinamide	rs12946859	17	77327782	C	T	0.263	-0.266	0.056	1.8e-06	2076	0.0274294	58.4366
Niacinamide	rs351779	8	28204264	A	G	0.502	0.149	0.033	5.87e-06	2076	0.0111003	23.258
Niacinamide	rs4358672	6	890039	G	A	0.372	-0.228	0.051	7.23e-06	2076	0.0242886	51.5787
Niacinamide	rs12633712	3	175000000	A	C	0.377	0.167	0.037	5.18e-06	2076	0.0131006	27.5048
Niacinamide	rs10912537	1	171000000	A	G	0.242	-0.2	0.042	2.24e-06	2076	0.0146749	30.8592
Pantothenic acid	rs1765787	1	232000000	A	T	0.453	0.173	0.037	3.8e-06	2076	0.0148323	31.1952
Pantothenic acid	rs13141016	4	57937862	G	A	0.461	-0.188	0.038	8.05e-07	2076	0.0175645	37.0443
Pantothenic acid	rs706753	5	67901292	T	C	0.197	-0.208	0.047	7.9e-06	2076	0.013688	28.755
Pantothenic acid	rs9457038	6	166000000	G	T	0.085	-0.343	0.076	5.88e-06	2076	0.0183003	38.6251
Pantothenic acid	rs17324476	8	74926282	C	T	0.036	0.732	0.157	3.14e-06	2076	0.0371905	80.0352
Pantothenic acid	rs7862640	9	36030411	C	T	0.07	-0.334	0.073	4.71e-06	2076	0.0145246	30.5385
Pantothenic acid	rs1784391	11	134000000	G	A	0.235	-0.233	0.053	9.36e-06	2076	0.0195196	41.2498
Pantothenic acid	rs12580490	12	130000000	A	C	0.27	0.217	0.041	9e-08	2076	0.0185625	39.1889
Pantothenic acid	rs11620735	14	62402979	T	G	0.082	0.446	0.099	7.1e-06	2076	0.0299472	63.9662
Pantothenic acid	rs1440833	18	27389543	T	C	0.256	0.194	0.042	4.27e-06	2076	0.0143366	30.1375
Pantothenic acid	rs725233	21	39793179	T	A	0.079	0.334	0.075	9.24e-06	2076	0.0162334	34.1906
Propionic acid	rs6766484	3	186950433	C	T	0.007	1.415	0.316	7.52e-06	2076	0.0278349	59.3253
Propionic acid	rs11132322	4	169476590	C	T	0.311	-0.209	0.043	1.22e-06	2076	0.0187198	39.5275
Propionic acid	rs17479559	8	78818556	A	G	0.013	1.176	0.259	5.74e-06	2076	0.0354899	76.2409
Ribose 5-P and Ribulose 5-P	rs12046540	1	169000000	T	A	0.349	-0.175	0.04	9.65e-06	2076	0.0139159	29.2407
Ribose 5-P and Ribulose 5-P	rs11945434	4	93940966	G	C	0.061	0.37	0.078	2.43e-06	2076	0.015683	33.0129
Ribose 5-P and Ribulose 5-P	rs17164896	5	127000000	C	T	0.02	0.618	0.138	8.01e-06	2076	0.0149714	31.4923
Ribose 5-P and Ribulose 5-P	rs7718456	5	17430238	T	G	0.368	-0.256	0.058	9.67e-06	2076	0.0304842	65.1493
Ribose 5-P and Ribulose 5-P	rs2581561	8	138000000	C	T	0.224	-0.21	0.046	4.15e-06	2076	0.0153313	32.261
Ribose 5-P and Ribulose 5-P	rs7974528	12	129000000	T	C	0.381	0.199	0.043	4.14e-06	2076	0.0186789	39.4394
Ribose 5-P and Ribulose 5-P	rs9552616	13	22777783	T	C	0.108	0.338	0.062	5.88e-08	2076	0.0220116	46.6346
Ribose 5-P and Ribulose 5-P	rs12149918	16	80242952	T	C	0.023	-0.893	0.17	1.48e-07	2076	0.035839	77.0186
Serotonin	rs11204524	1	248000000	G	C	0.237	0.299	0.059	3.43e-07	2076	0.0323329	69.2323
Serotonin	rs16848753	2	213000000	A	G	0.149	-0.213	0.047	6.08e-06	2076	0.0115055	24.1168
Serotonin	rs2014998	2	218000000	G	A	0.261	-0.173	0.039	8.73e-06	2076	0.0115454	24.2014
Serotonin	rs11715386	3	179000000	C	T	0.129	-0.241	0.054	8.96e-06	2076	0.0130518	27.4011
Serotonin	rs2862078	3	153000000	C	T	0.473	-0.164	0.036	4.31e-06	2076	0.0134088	28.1606
Serotonin	rs17745202	6	112000000	G	A	0.145	0.222	0.048	4.39e-06	2076	0.01222	25.633
Serotonin	rs6908341	6	170000000	A	G	0.12	-0.253	0.057	8.96e-06	2076	0.0135187	28.3946
Serotonin	rs10761071	9	107000000	T	A	0.186	0.21	0.044	1.97e-06	2076	0.0133538	28.0436
Taurine	rs10494201	1	118000000	G	A	0.321	-0.179	0.037	1.88e-06	2076	0.0139672	29.3501
Taurine	rs12145104	1	234000000	C	T	0.309	0.225	0.046	9.01e-07	2076	0.0216188	45.7839
Taurine	rs12240141	1	21744665	A	C	0.131	0.226	0.049	3.7e-06	2076	0.0116289	24.3785
Taurine	rs12740439	1	234000000	G	A	0.514	-0.169	0.034	6.21e-07	2076	0.0142693	29.994
Taurine	rs13088785	3	1849171	G	T	0.017	-0.86	0.19	5.93e-06	2076	0.0247189	52.5157
Taurine	rs6878458	5	3364024	A	G	0.194	-0.225	0.05	6.99e-06	2076	0.0158319	33.3313
Taurine	rs10466408	11	12839527	A	G	0.106	0.274	0.057	1.67e-06	2076	0.014229	29.9081
Taurine	rs17110309	14	26164759	A	G	0.044	-0.367	0.082	6.99e-06	2076	0.0113311	23.7472
TMAO	rs3935570	1	19167371	T	G	0.261	0.227	0.043	1.56e-07	2076	0.0198777	42.0219
TMAO	rs4846884	1	231000000	A	C	0.156	0.211	0.047	6.19e-06	2076	0.0117236	24.5795
TMAO	rs17418675	2	55210605	T	C	0.341	0.156	0.035	9.11e-06	2076	0.0109375	22.9132
TMAO	rs13236413	7	157000000	C	T	0.09	0.408	0.086	2.23e-06	2076	0.0272668	58.0805
TMAO	rs16917161	8	52966057	T	A	0.092	0.262	0.059	9.23e-06	2076	0.0114685	24.0384
TMAO	rs2703228	8	5876009	G	C	0.323	0.217	0.041	1.28e-07	2076	0.020594	43.568
TMAO	rs12221306	10	17001338	T	A	0.387	0.158	0.035	5.04e-06	2076	0.0118445	24.8359
TMAO	rs7302178	12	27007893	A	G	0.164	0.237	0.053	6.4e-06	2076	0.015402	32.4121

## Sheet: Table S3
Table S3. The instrumental variables of diverticular disease.
SNP	Chr	Position	pval	beta	effect_allele	other_allele	eaf	se	N	r2	F
rs28588017	8	27769367	5e-08	0.05	T	G	0.88	0.009	724372	0.000528	382.669
rs8084155	18	74134952	4.9e-08	0.03	G	A	0.38	0.006	651548	0.00042408	276.425
rs1108849	20	10932296	4.8e-08	0.03	T	C	0.74	0.006	724372	0.00034632	250.951
rs849142	7	28185891	4.3e-08	0.03	C	T	0.5	0.005	724372	0.00045	326.113
rs4355095	2	225466385	4e-08	0.03	T	C	0.37	0.006	651548	0.00041958	273.49
rs284269	1	10655936	3.6e-08	0.06	C	A	0.07	0.011	724372	0.00046872	339.686
rs7858700	9	27351152	3.1e-08	0.03	C	A	0.46	0.006	651548	0.00044712	291.45
rs7100159	10	116689936	2.9e-08	0.03	G	A	0.56	0.005	724372	0.00044352	321.415
rs4782347	16	88821708	2.8e-08	0.03	G	C	0.48	0.006	651548	0.00044928	292.858
rs67459979	2	19225861	2.2e-08	0.08	G	T	0.04	0.014	724372	0.00049152	356.217
rs4235677	5	72925091	2.1e-08	0.03	G	A	0.48	0.005	724372	0.00044928	325.591
rs7926389	11	46711854	2.1e-08	0.04	A	G	0.85	0.008	724372	0.000408	295.664
rs72745974	15	82177419	1.9e-08	0.05	T	C	0.9	0.009	724372	0.00045	326.113
rs11616857	13	33858648	1.7e-08	0.03	C	T	0.4	0.006	651548	0.000432	281.59
rs11747491	5	487868	1.7e-08	0.07	C	T	0.94	0.012	651548	0.00055272	360.322
rs2874890	4	21127676	1.7e-08	0.03	G	C	0.26	0.006	724372	0.00034632	250.951
rs9429919	1	214526332	1.6e-08	0.03	G	A	0.35	0.006	724372	0.0004095	296.751
rs117974417	17	46156510	1.6e-08	0.04	C	G	0.84	0.007	724372	0.00043008	311.671
rs11752007	6	7242605	1.6e-08	0.05	T	C	0.88	0.009	651548	0.000528	344.198
rs1528487	2	167191814	1.4e-08	0.03	G	A	0.63	0.006	651548	0.00041958	273.49
rs62377436	5	122353702	1.4e-08	0.03	C	G	0.69	0.006	724372	0.00038502	279.004
rs74523137	15	53854703	1.4e-08	0.04	A	G	0.19	0.007	724372	0.00049248	356.914
rs11934833	4	157557583	1.3e-08	0.04	C	G	0.7	0.006	651548	0.000672	438.133
rs55916800	22	41049315	1.3e-08	0.04	C	T	0.22	0.007	651548	0.00054912	357.974
rs133015	22	38572526	1.2e-08	0.03	G	C	0.43	0.005	724372	0.00044118	319.719
rs7604042	2	232135541	7.2e-09	0.03	A	T	0.65	0.006	651548	0.0004095	266.917
rs8120950	20	62848286	6.9e-09	0.04	G	A	0.19	0.007	724372	0.00049248	356.914
rs8072532	17	2045273	6e-09	0.03	A	G	0.7	0.006	724372	0.000378	273.915
rs977987	16	75506593	5.5e-09	0.03	G	A	0.38	0.006	724372	0.00042408	307.321
rs4556017	7	100632790	5.3e-09	0.05	T	C	0.85	0.008	651548	0.0006375	415.626
rs9896789	17	42314567	5e-09	0.03	T	C	0.29	0.006	724372	0.00037062	268.566
rs11765505	7	1754118	4.3e-09	0.04	C	A	0.23	0.006	724372	0.00056672	410.748
rs9321086	6	127740472	3.9e-09	0.03	C	T	0.6	0.006	651548	0.000432	281.59
rs543819	11	116750073	3.1e-09	0.06	A	G	0.92	0.011	724372	0.00052992	384.062
rs2289081	2	20881840	2.9e-09	0.03	C	G	0.35	0.006	724372	0.0004095	296.751
rs72880127	11	29146643	2.7e-09	0.04	C	T	0.2	0.007	724372	0.000512	371.067
rs333483	3	78853284	2.4e-09	0.04	A	C	0.28	0.006	724372	0.00064512	467.607
rs72725098	15	39932973	2.4e-09	0.04	G	A	0.71	0.006	724372	0.00065888	477.588
rs9552514	13	22412095	2.3e-09	0.04	C	T	0.79	0.007	724372	0.00053088	384.758
rs12215596	6	15308120	2.3e-09	0.08	A	G	0.95	0.013	724372	0.000608	440.685
rs10828265	10	22019212	2.1e-09	0.03	C	T	0.41	0.006	651548	0.00043542	283.82
rs10236503	7	45293818	2.1e-09	0.03	C	T	0.53	0.005	724372	0.00044838	324.939
rs138706	22	39137834	1.7e-09	0.04	G	C	0.3	0.006	724372	0.000672	487.104
rs12535418	7	134558806	1.6e-09	0.04	C	T	0.69	0.006	724372	0.00068448	496.156
rs140933931	7	150627075	1.6e-09	0.11	G	T	0.97	0.018	724372	0.00070422	510.475
rs61403071	16	86699724	1.1e-09	0.04	T	C	0.28	0.006	724372	0.00064512	467.607
rs8028715	15	44028569	1e-09	0.04	C	G	0.84	0.007	724372	0.00043008	311.671
rs11537993	11	66109033	7.5e-10	0.03	C	T	0.34	0.006	724372	0.00040392	292.706
rs73235985	13	80198623	6.8e-10	0.08	A	C	0.95	0.014	651548	0.000608	396.381
rs1926209	10	53252180	5.3e-10	0.04	T	C	0.68	0.006	724372	0.00069632	504.745
rs3761123	20	62342468	4.9e-10	0.04	G	A	0.31	0.006	724372	0.00068448	496.156
rs2831511	21	29485359	4.5e-10	0.03	C	T	0.59	0.006	724372	0.00043542	315.543
rs759555	18	54890563	4e-10	0.04	T	C	0.26	0.007	651548	0.00061568	401.391
rs62472060	7	84548019	3.5e-10	0.04	C	T	0.32	0.006	724372	0.00069632	504.745
rs2305417	2	204360201	3.1e-10	0.03	G	A	0.53	0.005	724372	0.00044838	324.939
rs1881502	11	1507512	3e-10	0.04	C	T	0.81	0.007	724372	0.00049248	356.914
rs2140937	6	36937647	2.9e-10	0.09	T	C	0.95	0.014	651548	0.0007695	501.751
rs2466130	8	97182269	2.1e-10	0.03	G	A	0.48	0.005	724372	0.00044928	325.591
rs1545550	2	33360126	1.8e-10	0.05	A	G	0.89	0.009	724372	0.0004895	354.753
rs17770321	4	7901040	1.2e-10	0.04	G	A	0.56	0.005	724372	0.00078848	571.602
rs6006984	22	45714937	1.2e-10	0.04	T	C	0.72	0.006	651548	0.00064512	420.597
rs6970537	7	27217359	9.9e-11	0.04	G	A	0.56	0.005	724372	0.00078848	571.602
rs4326010	4	15375073	9.7e-11	0.04	G	C	0.27	0.006	724372	0.00063072	457.163
rs420851	3	42526600	9e-11	0.04	G	C	0.31	0.006	724372	0.00068448	496.156
rs6564890	16	81612541	8.3e-11	0.04	T	C	0.55	0.006	651548	0.000792	516.433
rs3808460	8	116597635	5.6e-11	0.04	C	T	0.6	0.006	724372	0.000768	556.744
rs11727676	4	145659064	4e-11	0.06	T	C	0.91	0.009	724372	0.00058968	427.399
rs10104189	8	122271418	2.7e-11	0.04	G	T	0.25	0.006	724372	0.0006	434.883
rs11061620	12	1163115	1.8e-11	0.04	C	T	0.61	0.006	724372	0.00076128	551.869
rs16974904	16	84950838	1.7e-11	0.04	G	C	0.29	0.006	651548	0.00065888	429.574
rs6442993	3	5846022	1.5e-11	0.05	C	G	0.77	0.007	651548	0.0008855	577.455
rs16971941	16	73457386	1.4e-11	0.07	G	C	0.91	0.01	724372	0.00080262	581.861
rs2093283	20	55362831	8.2e-12	0.04	A	G	0.55	0.006	651548	0.000792	516.433
rs55641758	2	42142204	6.9e-12	0.04	C	T	0.64	0.006	724372	0.00073728	534.458
rs1451193	10	36461567	4.5e-12	0.04	G	A	0.5	0.005	724372	0.0008	579.96
rs4465729	2	28039665	2.8e-12	0.04	C	T	0.48	0.006	651548	0.00079872	520.819
rs2501290	1	22353986	2.7e-12	0.04	C	G	0.33	0.006	724372	0.00070752	512.869
rs11664887	18	20034539	2e-12	0.04	C	T	0.24	0.006	724372	0.00058368	423.047
rs12041565	1	245773041	9.9e-13	0.05	T	C	0.18	0.007	724372	0.000738	534.98
rs10883922	10	105595430	9.5e-13	0.04	G	C	0.33	0.006	651548	0.00070752	461.308
rs906283	18	10928707	8.9e-13	0.04	C	T	0.48	0.006	651548	0.00079872	520.819
rs352143	3	52264907	8.1e-13	0.05	T	C	0.81	0.007	724372	0.0007695	557.832
rs11052722	12	33626530	8e-13	0.04	G	A	0.49	0.005	724372	0.00079968	579.728
rs2276068	11	70007484	7.2e-13	0.04	C	G	0.45	0.005	724372	0.000792	574.156
rs10172196	2	36780549	4.2e-13	0.04	A	G	0.31	0.006	724372	0.00068448	496.156
rs76926608	1	219704939	3.6e-13	0.14	G	A	0.98	0.019	651548	0.00076832	500.981
rs73144111	3	15466373	2.6e-13	0.07	T	G	0.91	0.009	724372	0.00080262	581.861
rs2915443	5	64282436	2.1e-13	0.05	T	G	0.17	0.007	724372	0.0007055	511.404
rs7853181	9	128223024	1.2e-13	0.04	A	G	0.55	0.005	724372	0.000792	574.156
rs208812	20	37494393	8.9e-14	0.04	C	G	0.34	0.006	724372	0.00071808	520.529
rs12600861	17	7355621	8.6e-14	0.04	A	C	0.62	0.006	651548	0.00075392	491.584
rs6721145	2	56183542	5.7e-14	0.04	G	A	0.59	0.006	724372	0.00077408	561.155
rs1427669	2	218795356	3.7e-14	0.05	T	G	0.76	0.007	651548	0.000912	594.752
rs2784255	1	221066373	3e-14	0.04	T	C	0.52	0.005	724372	0.00079872	579.031
rs739730	4	95805242	1.6e-15	0.04	G	C	0.34	0.006	724372	0.00071808	520.529
rs2280028	16	86233413	7.4e-17	0.07	G	A	0.87	0.009	651548	0.00110838	722.962
rs7756023	6	98330225	2.2e-17	0.05	G	A	0.56	0.005	724372	0.001232	893.525
rs1042917	21	47545768	2.1e-17	0.05	A	G	0.53	0.006	651548	0.0012455	812.513
rs8038526	15	76470755	1.4e-17	0.06	T	C	0.81	0.007	724372	0.00110808	803.55
rs143378550	9	133069741	8.6e-18	0.15	A	C	0.03	0.018	724372	0.0013095	949.806
rs9922342	16	69887272	5.5e-18	0.07	A	G	0.88	0.008	724372	0.00103488	750.413
rs55637913	10	97341033	4.7e-18	0.09	C	A	0.93	0.011	724372	0.00105462	764.742
rs11190202	10	101394821	2.8e-18	0.07	A	G	0.12	0.008	724372	0.00103488	750.413
rs10832343	11	15060670	2.8e-18	0.05	C	T	0.25	0.006	724372	0.0009375	679.734
rs1888693	10	18440444	1.4e-18	0.05	G	A	0.64	0.006	724372	0.001152	835.437
rs12083193	1	151962689	3.2e-19	0.05	G	C	0.71	0.006	724372	0.0010295	746.507
rs7644001	3	151053898	3.2e-19	0.05	G	A	0.38	0.006	724372	0.001178	854.314
rs529565	9	136149500	2.5e-19	0.05	T	C	0.65	0.006	724372	0.0011375	824.909
rs71472433	15	40649609	9.8e-20	0.07	C	A	0.16	0.007	724372	0.00131712	955.341
rs17111	16	84857244	4.2e-20	0.05	G	A	0.41	0.005	724372	0.0012095	877.186
rs3113037	7	96078564	6.3e-21	0.06	T	C	0.24	0.007	651548	0.00131328	856.788
rs1381333	8	120427596	5.1e-21	0.06	C	T	0.78	0.007	651548	0.00123552	805.994
rs17309930	11	27748493	4e-21	0.07	C	A	0.78	0.007	651548	0.00168168	1097.54
rs2973086	5	37751672	2.5e-22	0.06	A	G	0.45	0.006	651548	0.001782	1163.13
rs12764415	10	25734059	1.6e-22	0.08	C	T	0.87	0.008	724372	0.00144768	1050.18
rs9983489	21	47436230	5.3e-23	0.05	C	T	0.38	0.006	724372	0.001178	854.314
rs9514637	13	107902242	4.7e-25	0.07	G	A	0.76	0.006	724372	0.00178752	1297.14
rs6949391	7	102446863	5.4e-26	0.06	T	C	0.34	0.006	724372	0.00161568	1172.24
rs11899380	2	56079609	4e-27	0.09	A	G	0.12	0.008	724372	0.00171072	1241.32
rs3757584	7	73440695	7.3e-30	0.12	A	C	0.07	0.011	724372	0.00187488	1360.66
rs12976534	19	38743962	9.8e-31	0.06	A	G	0.46	0.005	724372	0.00178848	1297.84
rs16970678	13	108216200	1.1e-38	0.09	G	A	0.81	0.007	724372	0.00249318	1810.5
rs943985	10	25793302	1e-38	0.07	C	G	0.53	0.005	724372	0.00244118	1772.64
rs10910384	1	234353053	2e-52	0.11	C	A	0.18	0.007	724372	0.00357192	2596.67
rs10179961	2	144342661	9.3e-110	0.15	C	T	0.18	0.007	724372	0.006642	4843.44

## Sheet: Table S4
Table S4. The MR-PRESSO analysis of blood metabolites with diverticular disease
exposure	outcome	nsnp	Outlier	Global Test`$RSSobs	Global test. P value	Distortion Coefficient	Distortion test. P value	MR analysis	Beta	SE	P Value	outlier
Betaine	diverticular disease	12	0	9.226	0.737	NA	NA	Raw	0.00293593	0.00628748	0.649649
								Outlier-corrected	NA	NA	NA	NA
Carnitine	diverticular disease	11	0	7.005	0.841	NA	NA	Raw	0.00752317	0.00517388	0.176583
								Outlier-corrected	NA	NA	NA	NA
Carnosine	diverticular disease	13	0	22.352	0.102	NA	NA	Raw	-0.00220121	0.00699903	0.758541
								Outlier-corrected	NA	NA	NA	NA
Choline	diverticular disease	6	0	14.35	0.115	NA	NA	Raw	0.0250419	0.0189117	0.242755
								Outlier-corrected	NA	NA	NA	NA
Indole 3 propionate	diverticular disease	12	0	41.436	0.381	NA	NA	Raw	0.000955774	0.00938066	0.920679
								Outlier-corrected	NA	NA	NA	NA
Niacinamide	diverticular disease	Not enough intrumental variables
Pantothenic acid	diverticular disease	10	0	12.727	0.386	NA	NA	Raw	-0.0164235	0.00991495	0.132014
								Outlier-corrected	NA	NA	NA	NA
Propionic acid	diverticular disease	Not enough intrumental variables
Ribose 5-P and Ribulose 5-P	diverticular disease	7	0	11.994	0.223	NA	NA	Raw	-0.0199812	0.0134185	0.187041
								Outlier-corrected	NA	NA	NA	NA
Serotonin	diverticular disease	7	0	6.241	0.595	NA	NA	Raw	0.00356674	0.0110736	0.758309
								Outlier-corrected	NA	NA	NA	NA
Taurine	diverticular disease	8	0	17.73	0.448	NA	NA	Raw	0.00559984	0.00609533	0.388807
								Outlier-corrected	NA	NA	NA	NA
TMAO	diverticular disease	8	0	5.74	0.734	NA	NA	Raw	-0.00370134	0.00833226	0.670293
								Outlier-corrected	NA	NA	NA	NA

## Sheet: Table S5
Table S5. The MR-PRESSO analysis of diverticular disease with microbiota
exposure	outcome	nsnp	Outlier	Global Test`$RSSobs	Global test. P value	Distortion Coefficient	Distortion test. P value	MR analysis	Beta	SE	P Value
DD	Allisonella	77	0	95.644	0.555	NA	NA	Raw	0.019346	0.0600282	0.74794
								Outlier-corrected	NA	NA	NA
DD	Enterorhabdus	93	0	115.015	0.484	NA	NA	Raw	-0.00938547	0.0367792	0.799041
								Outlier-corrected	NA	NA	NA
DD	Erysipelatoclostridium	93	1	159.187	0.004	717.952	0.026	Raw	0.00764304	0.0379618	0.840795
								Outlier-corrected	-0.00123683	0.0370474	0.973426
DD	Eubacteriumcoprostanoligenesgroup	94	0	118.744	0.434	NA	NA	Raw	-0.0408006	0.0244835	0.0983452
								Outlier-corrected	NA	NA	NA
DD	Faecalibacterium	94	0	109.699	0.66	NA	NA	Raw	-0.0157856	0.0231026	0.495802
								Outlier-corrected	NA	NA	NA
DD	Oxalobacter	92	0	111.882	0.58	NA	NA	Raw	-0.00303112	0.0463647	0.94799
								Outlier-corrected	NA	NA	NA
DD	Peptococcus	93	0	99.363	0.866	NA	NA	Raw	-0.0240243	0.039437	0.543617
								Outlier-corrected	NA	NA	NA
DD	Romboutsia	94	0	134.117	0.135	NA	NA	Raw	-0.0551564	0.0288174	0.0581058
								Outlier-corrected	NA	NA	NA
DD	RuminococcaceaeUCG009	94	0	114.611	0.547	NA	NA	Raw	-0.00829699	0.0245292	0.735792
								Outlier-corrected	NA	NA	NA
DD	RuminococcaceaeUCG013	94	0	114.611	0.546	NA	NA	Raw	-0.00829699	0.0245292	0.735792
								Outlier-corrected	NA	NA	NA
DD	Ruminococcus1	94	0	106.206	0.752	NA	NA	Raw	0.0176056	0.0237121	0.459314
								Outlier-corrected	NA	NA	NA
DD	Ruminococcustorquesgroup	94	0	127.331	0.244	NA	NA	Raw	0.0167064	0.0251153	0.507262
								Outlier-corrected	NA	NA	NA
DD	Streptococcus	94	0	106.335	0.745	NA	NA	Raw	-0.0466444	0.0238847	0.0532609
								Outlier-corrected	NA	NA	NA
DD	Tyzzerella3	93	0	118.036	0.421	NA	NA	Raw	0.0929416	0.0441707	0.0375637
								Outlier-corrected	NA	NA	NA
